# Supplementary material for: Shear recovery and temperature stability of Ca2+ and Ag+ glycolipid fibrillar metallogels with unusual β-sheet-like domains
Source: Royal Society of Chemistry journal article supplement (doi:10.1039/d2sm00374k), 2022-12-12
Supplement: d2sm00374k1.pdf [file d2sm00374k1.pdf]

## Supporting information

### **Shear recovery and temperature stability of Ca<sup>2+</sup> and Ag<sup>+</sup> glycolipid fibrillar metallogels with unusual $\beta$ -sheet-like domains**

Alexandre Poirier,<sup>a</sup> Patrick Le Griel,<sup>a</sup> Thomas Bizien,<sup>b</sup> Thomas Zinn,<sup>c</sup> Petra Pernot,<sup>c</sup> Niki Baccile<sup>a,\*</sup>

<sup>a</sup> Sorbonne Université, Centre National de la Recherche Scientifique, Laboratoire de Chimie de la Matière Condensée de Paris, LCMCP, F-75005 Paris, France

<sup>b</sup> Synchrotron Soleil, L'Orme des Merisiers, Saint-Aubin, BP48, 91192 Gif-sur-Yvette Cedex, France

<sup>c</sup> ESRF – The European Synchrotron, CS40220, 38043 Grenoble, France

\* Corresponding author:

Dr. Niki Baccile

E-mail address: niki.baccile@sorbonne-universite.fr

Phone: +33 1 44 27 56 77

**Table S 1 – Literature survey based on the scattering (SAXS or SANS) data reported in each cited article. Articles cited under *SAFiN with disordered fibers* report a typical scattering profile of the fiber alone, with or without a structure peak. Articles cited under *SAFiN with suprafibrillar assembly* report scattering profiles where the fiber’s form factor is superimposed with the structure factor associated to the 3D organization of the fibers. Articles cited under  *$\beta$ -sheet-like gel (“nano-fishnet”)* report those hydrogels characterized by entanglement and  $\beta$ -sheet or  $\beta$ -sheet-like structure.**

| <b>SAFiN with disordered fibers</b>                       |                |
|-----------------------------------------------------------|----------------|
| Not gelled                                                | 1–4            |
| Gels                                                      | 5,6,15–17,7–14 |
| <b>SAFiN with suprafibrillar assembly</b>                 |                |
| Hexagonal bundles/Columnar hexagonal                      | 18–23          |
| Raft-like/lamellar (solution, not gelled)                 | 24,25          |
| <b><math>\beta</math>-sheet-like gel (“nano-fishnet”)</b> |                |
| Biopolymers (fibroin, actin)                              | 26–33          |
| SAFiN                                                     | This work      |

The typical SAXS profiles of self-assembled fibrillar hydrogels from amphiphiles generally show an intense low- $q$  scattering, of which the slope is related to the morphology (-1 for thin fibers and -2 for belts and ribbons<sup>4</sup>) and either a broad oscillation (form factor)<sup>3</sup> or a broad structural peak.<sup>34</sup> We are not aware of SAXS fingerprints of fibrillar hydrogels from low-molecular weight amphiphiles with a series of diffraction peaks in a lamellar order.

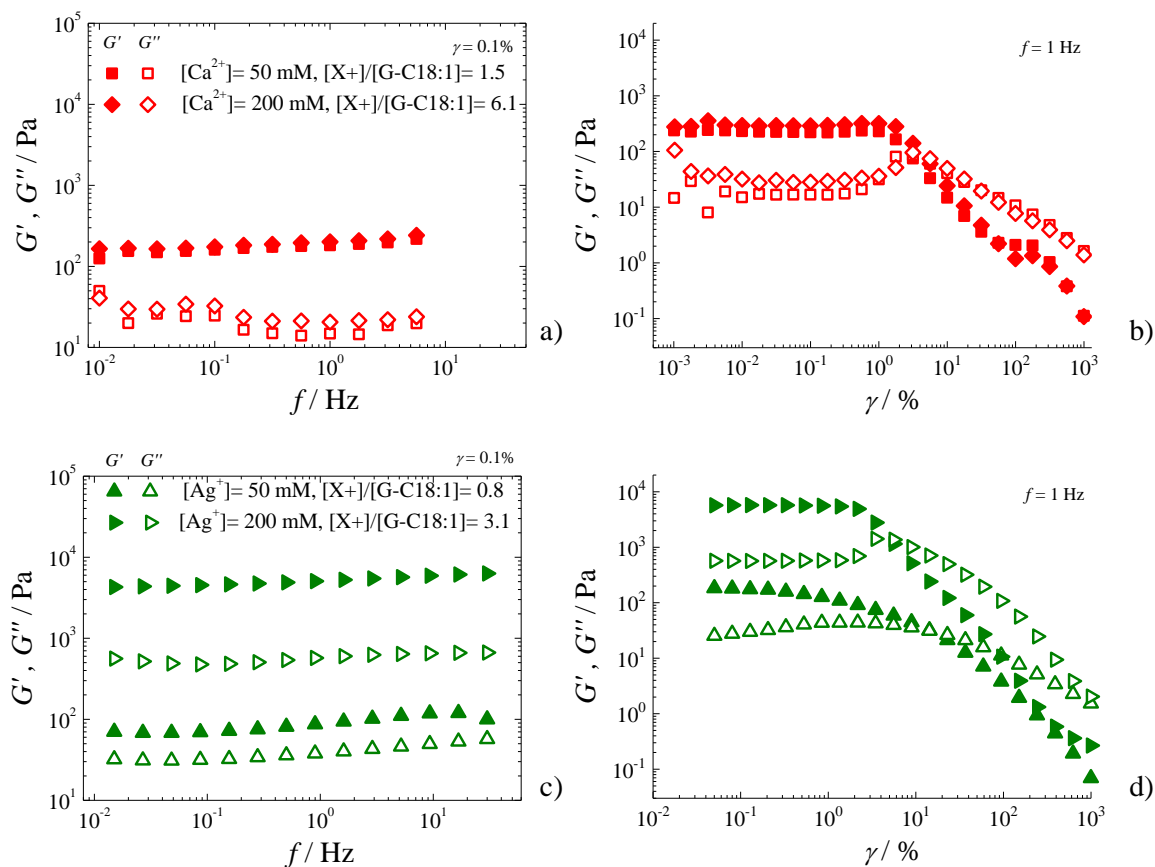

**Figure S 1 - Elastic and viscous moduli,  $G'$  and  $G''$ , of a,b)  $\{Ca^{2+}\}G-C18:1$  (red square and diamonds) or c,d)  $\{Ag^+\}G-C18:1$  (green triangle) hydrogels ( $C_{G-C18:1} = 3$  wt%, pH 10). Ion concentrations in the lipid solution are 50 mM and 200 mM.**

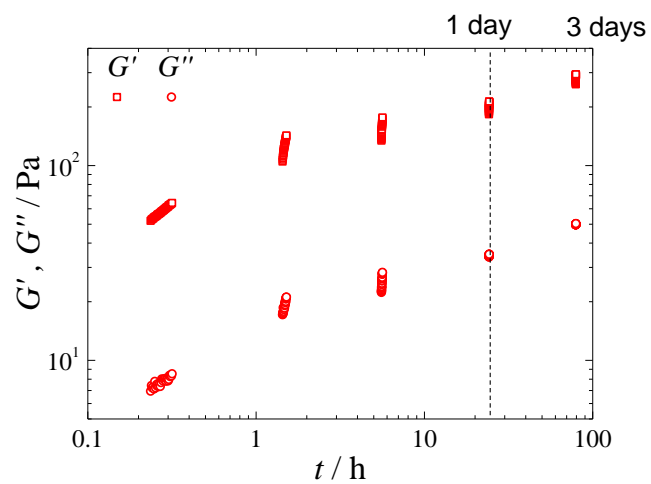

Figure S 2 – Time-dependency of the gelation ( $\gamma=0.3\%$ ,  $f=1$  Hz) of  $\{\text{Ca}^{2+}\}$ G-C18:1 hydrogels ( $C=3$  wt%, pH 10). The charge ratio is  $[\text{Ca}^{2+}]/[\text{G-C18:1}]=0.61$ . Hydrogel is left in a closed sample-holder and sampled at regular intervals, and not left under air on the rheometer geometry.

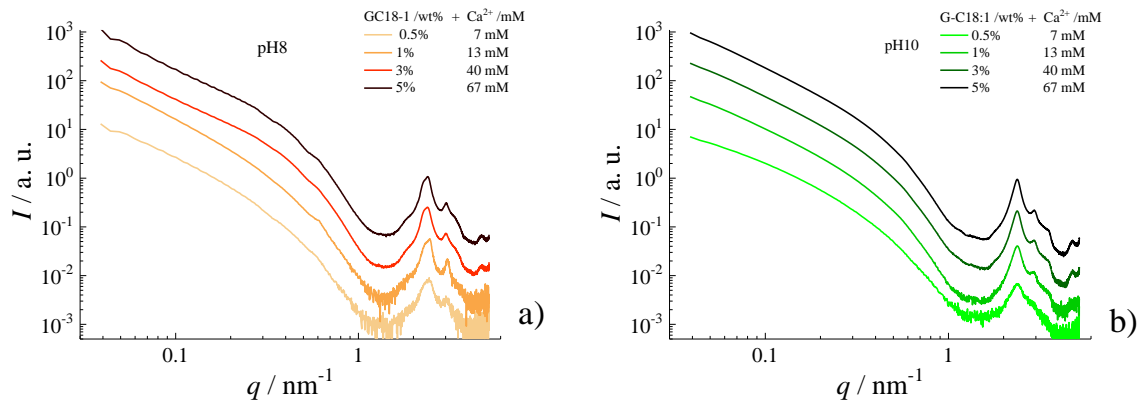

**Figure S 3 – SAXS spectra of a {Ca<sup>2+</sup>}G-C18:1 hydrogels at a molar ratio 0.61 for different surfactant concentrations, at a) pH8, b) pH10. The charge ratio is [Ca<sup>2+</sup>]/[G-C18:1]= 0.61. Data are shifted by a factor of about 5.**

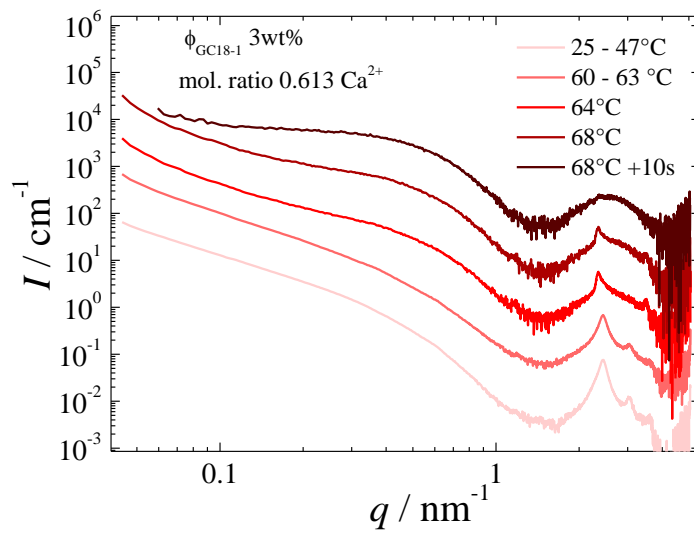

Figure S 4 - SAXS profiles recorded during temperature increase from 25°C to 70°C for a {Ca<sup>2+</sup>}G-C18:1 gel at 3 wt%, basic pH and [Ca<sup>2+</sup>]/[G-C18:1]= 0.61. Please note that the experimental setup in the SAXS-coupled rheometer (here, ID02, ESRF) is not suitable for a precise control over temperature. Data are shifted by a factor of about 15.

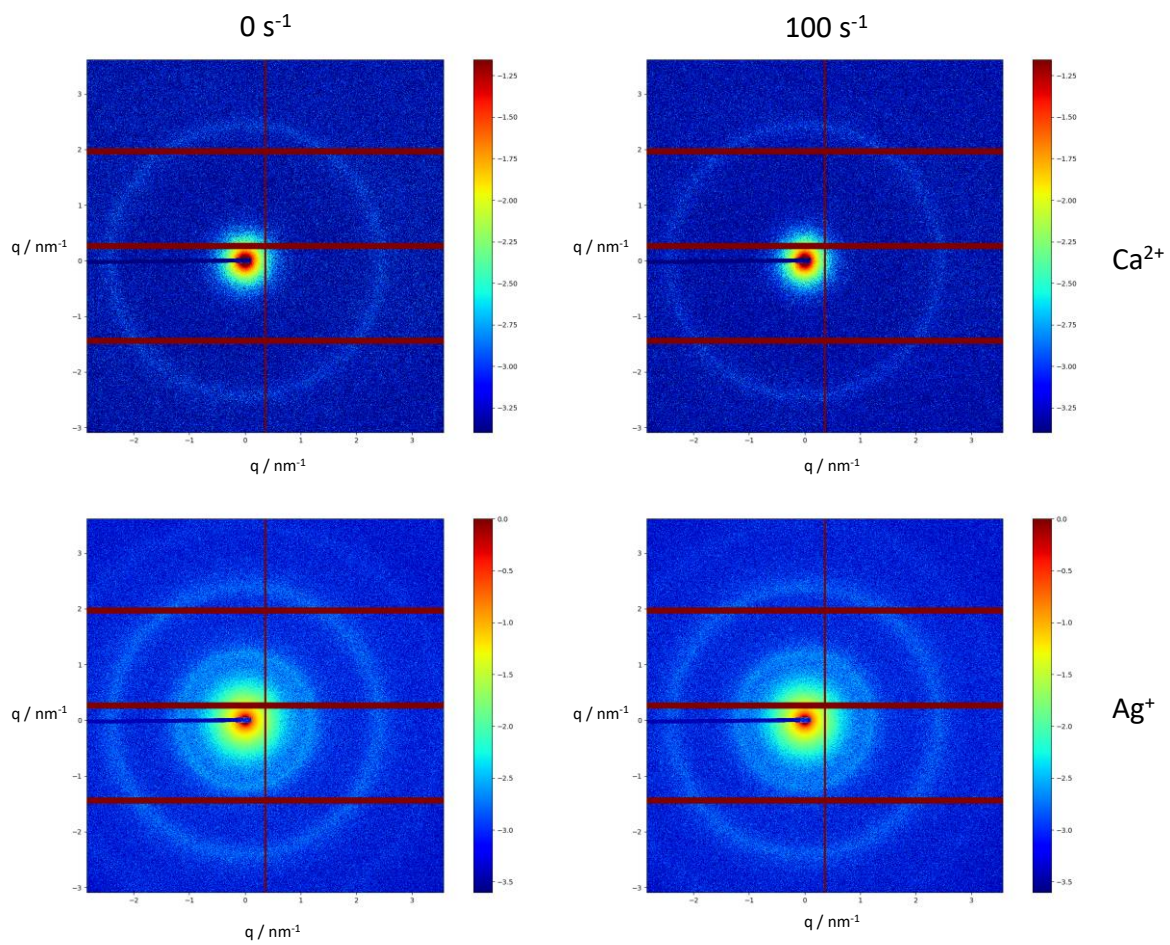

**Figure S 5 – Rheo-SAXS experiment. 2D SAXS spectra of {Ca<sup>2+</sup>} (molar ratio 0.61) or {Ag<sup>+</sup>} (molar ratio 1.0) G-C18:1 hydrogel ( $C_{G-C18:1} = 3\%$ ) at pH 10 sheared at 0 s<sup>-1</sup> or 100 s<sup>-1</sup>**

## References

- 1 P. Besenius, G. Portale, P. H. H. Bomans, H. M. Janssen, A. R. A. Palmans and E. W. Meijer, *Proc. Natl. Acad. Sci. U. S. A.*, 2010, **107**, 17888–17893.
- 2 J. Adamcik, A. Sánchez-Ferrer, N. Ait-Bouziad, N. P. Reynolds, H. A. Lashuel and R. Mezzenga, *Angew. Chemie - Int. Ed.*, 2016, **55**, 618–622.
- 3 W. C. Pomerantz, V. M. Yuwono, C. L. Pizzey, J. D. Hartgerink, N. L. Abbott and S. H. Gellman, *Angew. Chemie - Int. Ed.*, 2008, **47**, 1241–1244.
- 4 H. Cui, T. Muraoka, A. G. Cheetham and S. I. Stupp, *Nano Lett.*, 2009, **9**, 945–951.
- 5 V. Calabrese, J. C. Muñoz-García, J. Schmitt, M. A. da Silva, J. L. Scott, J. Angulo, Y. Z. Khimyak and K. J. Edler, *J. Colloid Interface Sci.*, 2019, **535**, 205–213.
- 6 H. Cui, A. G. Cheetham, E. T. Pashuck and S. I. Stupp, *J. Am. Chem. Soc.*, 2014, **136**, 12461–12468.
- 7 R. A. Hule, R. P. Nagarkar, B. Hammouda, J. P. Schneider and D. J. Pochan, *Macromolecules*, 2009, **42**, 7137–7145.
- 8 K. Nagy-Smith, P. J. Beltramo, E. Moore, R. Tycko, E. M. Furst and J. P. Schneider, *ACS Cent. Sci.*, 2017, **3**, 586–597.
- 9 F. Novelli, A. Strofaldi, S. De Santis, A. Del Giudice, S. Casciardi, L. Galantini, S. Morosetti, N. V. Pavel, G. Masci and A. Scipioni, *Langmuir*, 2020, **36**, 3941–3951.
- 10 B. O. Okesola, Y. Wu, B. Derkus, S. Gani, D. Wu, D. Knani, D. K. Smith, D. J. Adams and A. Mata, *Chem. Mater.*, 2019, **31**, 7883–7897.
- 11 D. Roberts, C. Rochas, A. Saiani and A. F. Miller, .
- 12 J. Schmitt, V. Calabrese, M. A. Da Silva, S. Lindhoud, V. Alfredsson, J. L. Scott and K. J. Edler, *Phys. Chem. Chem. Phys.*, 2018, **20**, 16012–16020.
- 13 Z. Yu, F. Tantakitti, L. C. Palmer and S. I. Stupp, *Nano Lett.*, 2016, **16**, 6967–6974.
- 14 S. Zhang, M. A. Greenfield, A. Mata, L. C. Palmer, R. Bitton, J. R. Mantei, C. Aparicio, M. O. De La Cruz and S. I. Stupp, *Nat. Mater.*, 2010, **9**, 594–601.
- 15 E. R. Draper, B. Dietrich, K. McAulay, C. Brasnett, H. Abdizadeh, I. Patmanidis, S. J. Marrink, H. Su, H. Cui, R. Schweins, A. Seddon and D. J. Adams, *Matter*, 2020, **2**, 764–778.
- 16 V. A. Mallia and R. G. Weiss, *ACS Symp. Ser.*, 2018, **1296**, 227–243.
- 17 K. McAulay, H. Wang, A. M. Fuentes-Caparrós, L. Thomson, N. Khunti, N. Cowieson, H. Cui, A. Seddon and D. J. Adams, *Langmuir*, 2020, **36**, 8626–8631.
- 18 P. Terech and U. Maitra, *J. Phys. Chem. B*, 2008, **112**, 13483–13492.
- 19 S. I. Stupp, R. H. Zha, L. C. Palmer, H. Cui and R. Bitton, *Faraday Discuss.*, 2013, **166**, 9–30.
- 20 Y. Wang, Y. Feng, X. Yang, J. Wang, W. Qi, X. Yang, X. Liu, Q. Xing, R. Su and Z. He, *Soft Matter*, 2019, **15**, 4818–4826.
- 21 H. Cui, E. T. Pashuck, Y. S. Velichko, S. J. Weigand, A. G. Cheetham, C. J. Newcomb and S. I. Stupp, *Science (80-. )*, 2010, **327**, 555–560.
- 22 L. C. Palmer, C.-Y. Y. Leung, S. Kewalramani, R. Kumthekar, C. J. Newcomb, M. Olvera, D. Cruz, M. J. Bedzyk, S. I. Stupp, M. Olvera De La Cruz, M. J. Bedzyk and S. I. Stupp, *J. Am. Chem. Soc.*, 2014, **136**, 14377–14380.
- 23 F. Gobeaux, N. Fay, C. Tarabout, C. Mériadec, F. Meneau, M. Ligeti, D. A. Buisson, J. C. Cintrat, K. M. H. Nguyen, L. Perrin, C. Valéry, F. Artzner and M. Paternostre, *J. Am. Chem. Soc.*, 2012, **134**, 723–733.
- 24 S. Zhang, M. A. Greenfield, A. Mata, L. C. Palmer, R. Bitton, J. R. Mantei, C. Aparicio, M. O. De La Cruz and S. I. Stupp, *Nat. Mater.*, 2010, **9**, 594–601.
- 25 A. S. Weingarten, R. V. Kazantsev, L. C. Palmer, M. McClendon, A. R. Koltonow, A. P. S. Samuel, D. J. Kiebal, M. R. Wasielewski and S. I. Stupp, *Nat. Chem.*, 2014, **6**, 964–970.
- 26 M. L. Gardel, J. H. Shin, F. C. MacKintosh, L. Mahadevan, P. Matsudaira and D. A. Weitz, *Science (80-. )*, 2004, **304**, 1301–1305.
- 27 G. C. L. Wong, A. Lin, J. X. Tang, Y. Li, P. A. Janmey and C. R. Safinya, *Phys. Rev. Lett.*, 2003, **91**, 1–4.
- 28 O. Pelletier, E. Pokidysheva, L. S. Hirst, N. Boussein, Y. Li and C. R. Safinya, *Phys. Rev. Lett.*, 2003, **91**, 3–6.
- 29 R. Liu, Q. Deng, Z. Yang, D. Yang, M. Y. Han and X. Y. Liu, *Adv. Funct. Mater.*, 2016, **26**, 5534–5541.
- 30 U. J. Kim, J. Park, C. Li, H. J. Jin, R. Valluzzi and D. L. Kaplan, *Biomacromolecules*, 2004, **5**, 786–792.
- 31 T. D. Fink and R. H. Zha, *Macromol. Rapid Commun.*, 2018, **39**, 1–17.
- 32 O. Rathore and D. Y. Sogah, *Macromolecules*, 2001, **34**, 1477–1486.
- 33 J. M. Smeenk, P. Schön, M. B. J. Otten, S. Speller, H. G. Stunnenberg and J. C. M. Van Hest, *Macromolecules*, 2006, **39**, 2989–2997.
- 34 A.-S. S. Cuvier, J. Berton, C. V Stevens, G. C. Fadda, F. Babonneau, I. N. A. a Van Bogaert, W. Soetaert, G. Pehau-Arnaudet and N. Baccile, *Soft Matter*, 2014, **10**, 3950–3959.
